# Supplementary material for: The relevance of contact-independent cell-to-cell transfer of TDP-43 and SOD1 in amyotrophic lateral sclerosis
Source: PubMed Central journal article supplement (PMC6565888; doi:10.1016/j.bbadis.2017.07.007), 2017-11
Supplement: mmc1.pdf [file mmc1.pdf]

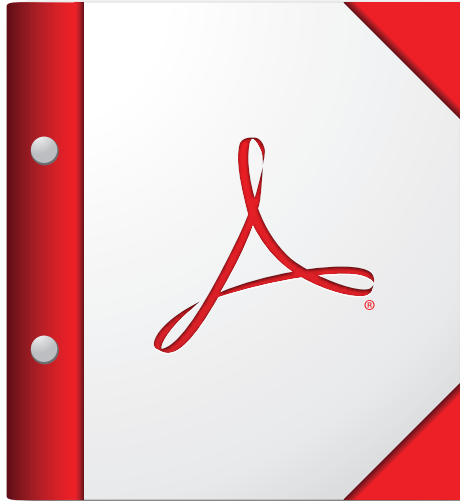

**For the best experience, open this PDF portfolio in  
Acrobat 9 or Adobe Reader 9, or later.**

[Get Adobe Reader Now!](#)
